1 **Genetic association analysis of SARS-CoV-2 infection in 455,838 UK Biobank participants**

2 J. A. Kosmicki<sup>†</sup>, J. E. Horowitz<sup>†</sup>, N. Banerjee, R. Lanche, A. Marcketta, E. Maxwell, Xiaodong  
3 Bai, D. Sun, J. Backman, D. Sharma, C. O’Dushlaine, A. Yadav, A. J. Mansfield, A. Li, J.  
4 Mbatchou, K. Watanabe, L. Gurski, S. McCarthy, A. Locke, S. Khalid, O. Chazara, Y. Huang, E.  
5 Kvikstad, A. Nadkar, A. O’Neill, P. Nioi, M. M. Parker, S. Petrovski, H. Runz, J. D. Szustakowski,  
6 Q. Wang, Regeneron Genetics Center\*, UKB Exome Sequencing Consortium\*, M. Jones, S.  
7 Balasubramanian, W. Salerno, A. Shuldiner, J. Marchini, J. Overton, L. Habegger, M. N. Cantor,  
8 J. Reid, A. Baras<sup>‡</sup>, G. R. Abecasis<sup>‡</sup>, M. A. Ferreira<sup>‡</sup>

9

10 From:

11 Regeneron Genetics Center, 777 Old Saw Mill River Rd., Tarrytown, NY 10591, USA (JK, JEH,  
12 NB, RL, AM, EM, XB, DS, JB, DSh, CO’D, AY, AJM, AL, JM, KW, LG, SM, AL, SK, MJ, SB,  
13 WS, AS, JM, JO, LH, MNC, JR, AB, GRA, MAF)

14 Centre for Genomics Research, Discovery Sciences, BioPharmaceuticals R&D, AstraZeneca,  
15 Cambridge, UK (OC, AO’N, SP, QW)

16 Biogen, 300 Binney St, Cambridge, MA 02142, USA (YH, HR)

17 Alnylam Pharmaceuticals, 675 West Kendall St, Cambridge, MA 02142, USA (MMP, PN).

18 Bristol Myers Squibb, Route 206 and Province Line Road, Princeton, NJ 08543 (EK, AN, JDS)

19 \*A complete list of investigators is provided in the Supplementary Appendix.

20 <sup>†</sup>J. A. Kosmicki and J. E. Horowitz contributed equally to this manuscript.

21 <sup>‡</sup>A. Baras, G. R. Abecasis and M. A. Ferreira jointly supervised this work.

22 Correspondence to: manuel.ferreira@regeneron.com and goncalo.abecasis@regeneron.com

23 **This research has been conducted using the UK Biobank Resource (Project 26041)**

24 **ABSTRACT**

25 **Background.** Severe acute respiratory syndrome coronavirus-2 (SARS-CoV-2) causes  
26 Coronavirus disease-19 (COVID-19), a respiratory illness with influenza-like symptoms that can  
27 result in hospitalization or death. We investigated human genetic determinants of COVID-19 risk  
28 and severity in 455,838 UK Biobank participants, including 2,003 with COVID-19.

29 **Methods.** We defined eight COVID-19 phenotypes (including risks of infection, hospitalization  
30 and severe disease) and tested these for association with imputed and exome sequencing variants.

31 **Results.** We replicated prior COVID-19 genetic associations with common variants in the 3p21.31  
32 (in *LZTFL1*) and 9q34.2 (in *ABO*) loci. The 3p21.31 locus (rs11385942) was associated with  
33 disease severity amongst COVID-19 cases (OR=2.2,  $P=3 \times 10^{-5}$ ), but not risk of SARS-CoV-2  
34 infection without hospitalization (OR=0.89,  $P=0.25$ ). We identified two loci associated with risk  
35 of infection at  $P < 5 \times 10^{-8}$ , including a missense variant that tags the  $\epsilon 4$  haplotype in *APOE*  
36 (rs429358; OR=1.29,  $P=9 \times 10^{-9}$ ). The association with rs429358 was attenuated after adjusting for  
37 cardiovascular disease and Alzheimer's disease status (OR=1.15,  $P=0.005$ ). Analyses of rare  
38 coding variants identified no significant associations overall, either exome-wide or with (i) 14  
39 genes related to interferon signaling and reported to contain rare deleterious variants in severe  
40 COVID-19 patients; (ii) 36 genes located in the 3p21.31 and 9q34.2 GWAS risk loci; and (iii) 31  
41 additional genes of immunologic relevance and/or therapeutic potential.

42 **Conclusions.** Our analyses corroborate the association with the 3p21.31 locus and highlight that  
43 there are no rare protein-coding variant associations with effect sizes detectable at current sample  
44 sizes. Our full analysis results are publicly available, providing a substrate for meta-analysis with  
45 results from other sequenced COVID-19 cases as they become available. Association results are  
46 available at <https://rgc-covid19.regeneron.com> .

47

## 48 INTRODUCTION

49 The severe acute respiratory syndrome coronavirus 2 (SARS-CoV-2) was discovered in Wuhan,  
50 China in late 2019 [1] and causes coronavirus disease 2019 (COVID-19) [2]. COVID-19  
51 symptoms range from flu-like symptoms such as fever, cough and headaches to respiratory failure,  
52 acute immune responses and death [3]. It is estimated that most infected individuals display few,  
53 if any, symptoms [4, 5]. As of October 2020, SARS-CoV-2 has been reported in >41 million  
54 individuals and to be associated with >1.1 million deaths worldwide. Known risk factors include  
55 male sex, older age, ancestry, obesity, cardiovascular and kidney disease, chronic obstructive  
56 pulmonary disease (COPD) and dementia [6-9], among others.

57 Studying host genetic variation among individuals infected with SARS-CoV-2 holds the  
58 potential to identify mechanisms that influence disease severity and outcomes. Akin to *IFNGRI*,  
59 *STAT1*, *TLR7* and other genetic immune deficiencies that predispose to early-onset severe  
60 infections [10-15], this information may help identify individuals at high risk of SARS-CoV-2  
61 infection who should be prioritized for disease prevention strategies, including vaccination or  
62 monoclonal antibody treatments [16, 17]. Further, understanding host mechanisms that provide  
63 protection from SARS-CoV-2 infection or that modulate disease severity might guide the  
64 development of treatment efforts, in the same way that *CCR5* variation and HIV infection [18], or  
65 *FUT2* variation and infection by certain strains of norovirus [19], helped identify therapeutic  
66 strategies and targets for these diseases.

67 Since the start of the SARS-CoV-2 pandemic, host genetic analysis of common genetic  
68 variation among SARS-CoV-2 patients identified two genome-wide significant loci, one at  
69 3p21.31 spanning at least six genes (including *SLC6A20* and *LZTFL1*) and a second at 9q34.2 in  
70 the *ABO* locus [20, 21]. The first locus has been consistently replicated in additional studies [21,

71 22], while the association at the *ABO* locus remains contentious. In addition to these genome-wide  
72 association studies (GWAS), two studies suggest that rare deleterious variants in genes related to  
73 interferon signaling may be implicated in more extreme clinical outcomes [14, 23]. However, to  
74 date, there has been no assessment of the contribution of rare genetic variation to COVID-19  
75 disease susceptibility or severity through large population-based exome-wide association analyses.

76 To identify rare coding variants associated with COVID-19 susceptibility and severity, we  
77 evaluated clinical data derived from quantitative polymerase chain reaction (qPCR) tests for  
78 SARS-CoV-2, together with anonymized electronic health records and death registry data for both  
79 COVID-19 patients and other individuals in the UK Biobank study. We first analyzed imputed  
80 data for 455,838 individuals (2,003 with COVID-19), including a deep dive into the unequivocal  
81 3p21.31 locus as a positive control, to calibrate our susceptibility and severity phenotypes with  
82 those used in other COVID-19 GWAS. We then analyzed exome sequencing data for a subset of  
83 424,183 individuals (1,865 with COVID-19) to investigate disease associations with individual  
84 rare variants and rare variant-aggregated gene-burden tests. In addition to an agnostic exome-wide  
85 search for genetic risk factors, we also focused on 81 specific genes of interest (i) with a known  
86 role in interferon signaling and recently observed to contain rare deleterious variants in patients  
87 with severe COVID-19 [14, 23]; (ii) near two common risk variants for COVID-19 identified by  
88 GWAS [20]; or (iii) of immunologic relevance and/or therapeutic potential.

89 This study represents the largest exome-sequencing study of COVID-19 performed to date.  
90 Expanded analyses, particularly among individuals disproportionately affected by SARS-CoV-2,  
91 are essential to help identify human genetic determinants of disease risk and identify therapeutic  
92 avenues for the treatment of COVID-19.

93

94 **METHODS**

95

96 **Study participants**

97 We studied the host genetics of SARS-CoV-2 infection in participants of the UK Biobank study,  
98 which took place between 2006 and 2010 and includes approximately 500,000 adults aged 40-69  
99 at recruitment [24]. In collaboration with UK health authorities, the UK Biobank has made  
100 available regular updates on COVID-19 status for all participants, including results from four main  
101 data types: qPCR test for SARS-CoV-2, anonymized electronic health records, primary care and  
102 death registry data. We report results based on the 12 September 2020 data refresh and excluded  
103 from the analysis 28,547 individuals with a death registry event prior to 2020.

104

105 **COVID-19 phenotypes used for genetic association analyses**

106 Using the data types outlined above, we grouped UK Biobank participants into three broad  
107 COVID-19 disease categories (**Table 1**): (i) positive – those with a positive qPCR test for SARS-  
108 CoV-2 or a COVID-19-related ICD10 code (U07), hospitalization or death; (ii) negative – those  
109 with only negative qPCR test results for SARS-CoV-2 and no COVID-19-related ICD10 code  
110 (U07), hospitalization or death; and (iii) unknown – those with no qPCR test result and no COVID-  
111 19-related ICD10 code (U07), hospitalization or death. We then used these broad COVID-19  
112 disease categories, in addition to hospitalization and disease severity information, to create eight  
113 COVID-19-related phenotypes for genetic association analyses, as detailed in **Table 2**.

114

115 **Array genotyping and imputation**

116 DNA samples from participants of the UK Biobank study were genotyped as described previously

117 [24] using the Applied Biosystems UK BiLEVE Axiom Array (N=49,950) or the closely related  
118 Applied Biosystems UK Biobank Axiom Array (N=438,427). Genotype data for variants not  
119 included in the arrays were then inferred using three reference panels (Haplotype Reference  
120 Consortium, UK10K and 1000 Genomes Project phase 3) as described previously [24].

121

## 122 **Exome sequencing**

123 *Sample Preparation and Sequencing.* Genomic DNA samples normalized to approximately 16  
124 ng/ul were transferred to the Regeneron Genetics Center from the UK Biobank in 0.5ml 2D matrix  
125 tubes (Thermo Fisher Scientific) and stored in an automated sample biobank (LiCONiC  
126 Instruments) at -80°C prior to sample preparation. Exome capture was completed using a high-  
127 throughput, fully-automated approach developed at the Regeneron Genetics Center. Briefly, DNA  
128 libraries were created by enzymatically shearing 100ng of genomic DNA to a mean fragment size  
129 of 200 base pairs using a custom NEBNext Ultra II FS DNA library prep kit (New England  
130 Biolabs) and a common Y-shaped adapter (Integrated DNA Technologies) was ligated to all DNA  
131 libraries. Unique, asymmetric 10 base pair barcodes were added to the DNA fragment during  
132 library amplification with KAPA HiFi polymerase (KAPA Biosystems) to facilitate multiplexed  
133 exome capture and sequencing. Equal amounts of sample were pooled prior to overnight exome  
134 capture, approximately 16 hours, with a slightly modified version of IDT's xGen probe library;  
135 supplemental probes were added to capture regions of the genome well-covered by a previous  
136 capture reagent (NimbleGen VCRome), but poorly covered by the standard xGen probes (design  
137 bed file available by request). Captured fragments were bound to streptavidin-coupled Dynabeads  
138 (Thermo Fisher Scientific) and non-specific DNA fragments removed through a series of stringent  
139 washes using the xGen Hybridization and Wash kit according to the manufacturer's recommended

140 protocol (Integrated DNA Technologies). The captured DNA was PCR amplified with KAPA  
141 HiFi and quantified by qPCR with a KAPA Library Quantification Kit (KAPA Biosystems). The  
142 multiplexed samples were pooled and then sequenced using 75 base pair paired-end reads with  
143 two 10 base pair index reads on the Illumina NovaSeq 6000 platform using S2 or S4 flow cells.

144

145 *Variant calling and quality control.* Sample read mapping and variant calling, aggregation and  
146 quality control were performed via the SPB protocol described in Van Hout et al. [25]  
147 (<https://www.ukbiobank.ac.uk/wp-content/uploads/2019/08/UKB-50k-Exome-Sequencing-Data-Release-July-2019-FAQs.pdf>). Briefly, for each sample, NovaSeq WES reads are mapped with  
148 BWA MEM to the hg38 reference genome. Small variants are identified with WeCall and reported  
149 as per-sample gVCFs. These gVCFs are aggregated with GLnexus into a joint-genotyped, multi-  
150 sample VCF (pVCF). SNV genotypes with read depth less than seven ( $DP < 7$ ) and indel genotypes  
151 with read depth less than ten ( $DP < 10$ ) are changed to no-call genotypes. After the application of  
152 the DP genotype filter, a variant-level allele balance filter is applied, retaining only variants that  
153 meet either of the following criteria: (i) at least one homozygous variant carrier or (ii) at least one  
154 heterozygous variant carrier with an allele balance greater than the cutoff ( $AB \geq 0.15$  for SNVs  
155 and  $AB \geq 0.20$  for indels).

157

158 *Identification of low-quality variants from exome-sequencing using machine learning.* Briefly, we  
159 defined a set of positive control and negative control variants based on: (i) concordance in  
160 genotype calls between array and exome sequencing data; (ii) mendelian inconsistencies in the  
161 exome sequencing data; (iii) differences in allele frequencies between exome sequencing batches;  
162 (iv) variant loadings on 20 principal components derived from the analysis of variants with a

163 MAF<1%. The model was then trained on 30 available WeCall/GLnexus site quality metrics,  
164 including, for example, allele balance and depth of coverage. We split the data into training (80%)  
165 and test (20%) sets. We then performed a grid search with 5-fold cross-validation on the training  
166 set and applied the model with highest accuracy to the test set. Out of 15 million variants in the  
167 exome target region, 1 million (6.5%) were identified as low-quality and excluded from the  
168 analysis. Similarly, we identified and removed 6 million out of 21 million variants (28.6%) in the  
169 buffer region.

170  
171 *Gene burden masks.* Briefly, for each gene region as defined by Ensembl [26], genotype  
172 information from multiple rare coding variants was collapsed into a single burden genotype, such  
173 that individuals who were: (i) homozygous reference (Ref) for all variants in that gene were  
174 considered homozygous (RefRef); (ii) heterozygous for at least one variant in that gene were  
175 considered heterozygous (RefAlt); (iii) and only individuals that carried two copies of the  
176 alternative allele (Alt) of the same variant were considered homozygous for the alternative allele  
177 (AltAlt). We did not phase rare variants; compound heterozygotes, if present, were considered  
178 heterozygous (RefAlt). We did this separately for four classes of variants: (i) predicted loss of  
179 function (pLoF), which we refer to as an “M1” burden mask; (ii) pLoF or missense (“M2”); (iii)  
180 pLoF or missense variants predicted to be deleterious by 5/5 prediction algorithms (“M3”); (iv)  
181 pLoF or missense variants predicted to be deleterious by 1/5 prediction algorithms (“M4”). The  
182 five missense deleterious algorithms used were SIFT [27], PolyPhen2 (HDIV), PolyPhen2  
183 (HVAR) [28], LRT [29], and MutationTaster [30]. For each gene, and for each of these four  
184 groups, we considered five separate burden masks, based on the frequency of the alternative allele  
185 of the variants that were screened in that group: <1%, <0.1%, <0.01%, <0.001% and singletons



186 only. Each burden mask was then tested for association with the same approach used for individual  
187 variants (see below).

188

### 189 **Genetic association analyses**

190 Association analyses in the UK Biobank study were performed using the Firth logistic regression  
191 test implemented in REGENIE [31], separately for variants derived from array-based imputation  
192 and exome sequencing. In this test, Firth's approach is applied when the p-value from the standard  
193 logistic regression score test is below 0.05. As the Firth penalty (*i.e.* Jeffrey's invariant prior)  
194 corresponds to a data augmentation procedure where each observation is split into a case and a  
195 control with different weights, it can handle variants with no minor alleles among cases. With no  
196 covariates, this corresponds to adding 0.5 in every cell of a 2x2 table of allele counts versus case-  
197 control status.

198 We included in step 1 of REGENIE (*i.e.* prediction of individual trait values based on the  
199 genetic data) variants that were directly genotyped, had a minor allele frequency (MAF) >1%,  
200 <10% missingness, Hardy-Weinberg equilibrium test  $P$ -value  $>10^{-15}$  and after linkage-  
201 disequilibrium (LD) pruning (1000 variant windows, 100 sliding windows and  $r^2 < 0.9$ ). The  
202 association model used in step 2 of REGENIE included as covariates age, age<sup>2</sup>, sex, age-by-sex,  
203 age<sup>2</sup>-by-sex, and the first 10 ancestry-informative principle components (PCs) released by the UK  
204 Biobank. For the analysis of exome variants, we also included as covariates an indicator for exome  
205 sequencing batch and 20 PCs derived from the analysis of exome variants with a MAF between  
206  $2.6 \times 10^{-5}$  (roughly corresponding to a minor allele count [MAC] of 20) and 1%. We did this because  
207 previous studies have found that PCs derived from common variants do not adequately correct for  
208 fine-scale population structure [32, 33].

209 For imputed variants, we retained association results for variants with both an imputation  
210 information score  $\geq 0.3$  and MAC  $\geq 5$ , and either (i) MAF  $> 0.5\%$  or (ii) a protein-altering  
211 consequence (*i.e.* pLOF, missense or splice variants). For exome sequencing variants, we retained  
212 association results for variants with a MAC  $\geq 5$ . Association analyses were performed separately  
213 for three different ancestries defined based on the array data (African [AFR], European [EUR] and  
214 South Asian [SAS]), with results subsequently combined across ancestries using an inverse  
215 variance-weighted fixed-effects meta-analysis.

216

### 217 **Results availability**

218 All genotype-phenotype association results reported in this study are available for browsing using  
219 the RGC's COVID-19 Results Browser (<https://rgc-covid19.regeneron.com>). Data access and use  
220 is limited to research purposes in accordance with the Terms of Use (<https://rgc-covid19.regeneron.com/terms-of-use>). The COVID-19 Results Browser provides a user-friendly  
221 interface to explore genetic association results, enabling users to query summary statistics across  
222 multiple cohorts and association studies using genes, variants or phenotypes of interest. Results  
223 are displayed in an interactive tabular view ordered by p-value – enabling filtering, sorting,  
224 grouping and viewing additional statistics – with link outs to individual GWAS reports, including  
225 interactive Manhattan and QQ plots. LocusZoom views of LD information surrounding variants  
226 of interest are also available, with LD calculated using the respective source genetic datasets.

228 The data resource supporting the COVID-19 Results Browser is built using a processed  
229 version of the raw association analysis outputs. Using the RGC's data engineering toolkit based in  
230 Apache Spark and Project Glow (<https://projectglow.io/>), association results are annotated,  
231 enriched and partitioned into a distributed, columnar data store using Apache Parquet. Processed

232 Parquet files are registered with AWS Athena, enabling efficient, scalable queries on unfiltered  
233 association result datasets. Additionally, “filtered” views of associations significant at a threshold  
234 of p-value  $< 0.001$  are stored in AWS RDS Aurora databases for low latency queries to service  
235 primary views of top associations. APIs into RDS and Athena are managed behind the scenes such  
236 that results with a p-value  $> 0.001$  are pulled from Athena as needed.  
237

238 **RESULTS**

239

240 **Demographics and health characteristics of study participants**

241 Among 473,977 participants of the UK Biobank study who were alive in January 2020, 2,118 were  
242 COVID-19 positive, 16,331 were COVID-19 negative and 455,528 had unknown COVID-19  
243 status (**Table 1**). Relative to participants who were COVID-19 negative or unknown (**Table 1**),  
244 COVID-19 positive individuals were more likely to be male, to have African or South Asian  
245 ancestry and to have cardiovascular or respiratory co-morbidities (**Table 3**). These co-morbidities  
246 were also observed in analyses stratified by ancestry group (**Table 4**).

247

248 **Genome-wide association study (GWAS) of imputed variants**

249 We performed ancestry-specific GWAS for eight COVID-19-related phenotypes, using imputed  
250 variants available for a subset of 455,838 individuals (**Table 5**). These phenotypes captured a  
251 spectrum of disease severity, from COVID-19 cases who did not require hospitalization to those  
252 with severe disease (respiratory support or death). Association results are publicly available at  
253 <https://rgc-covid19.regeneron.com> and main findings summarized below. The genomic inflation  
254 factor ( $\lambda_{GC}$ ) was close to 1 for most analyses (**Supplementary Table 1**).

255

256 *Association with variants reported in previous COVID-19 GWAS.* Recently, Ellinghaus et al. [20]  
257 performed a GWAS comparing 1,610 cases with a PCR-positive test for SARS-CoV-2 and  
258 respiratory failure, against 2,205 controls with unknown SARS-CoV-2 status (mostly blood  
259 donors), all from Spain or Italy. Two loci reached genome-wide significance in that study: (i)  
260 3p21.31, near the *LZTFL1* gene (rs11385942, OR=1.77 for the GA allele; 95% CI=1.48-2.11;

261  $P=1.1 \times 10^{-10}$ ); and (ii) 9q34.2, near the *ABO* gene (rs657152, OR=1.39 for the A allele; 95%  
262 CI=1.20-1.47;  $P=4.9 \times 10^{-8}$ ) [20]. Both loci were recently replicated in a larger GWAS [21], with  
263 the former also replicated in a GWAS of severe COVID-19 patients in the UK [22]. We found a  
264 nominally significant and directionally consistent association with both variants in the European-  
265 specific analysis of the phenotype COVID-19 positive vs. COVID-19 negative or unknown  
266 (**Figure 1**). For the 3p21.31 locus (**Figure 1A**), we observed the largest effect with risks of  
267 hospitalization (OR=1.69; 95% CI=1.25-2.28;  $P=6 \times 10^{-4}$ ) and severe disease (OR=2.29; 95%  
268 CI=1.56-3.35;  $P=2 \times 10^{-5}$ ) amongst COVID-19 cases. In contrast, there was no association with the  
269 phenotype COVID-19 positive and not hospitalized vs. COVID-19 negative or unknown  
270 (OR=0.87; 95% CI=0.71-1.08;  $P=0.21$ ). These results suggest that variants in this 3p21.31 locus  
271 influence COVID-19 severity and not risk of SARS-CoV-2 infection.

272

273 *Significant associations with common variants in ancestry-specific GWAS.* Across the eight  
274 phenotypes tested, we identified two loci with an association  $P < 5 \times 10^{-8}$ , both found in the  
275 European-specific analysis of the phenotype COVID-19 positive (N=1,797) vs. COVID-19  
276 negative or unknown (N=434,038). The first locus was on chromosome 19q13.32; the lead variant  
277 was rs429358 (MAF=15%, OR=1.29, CI=1.18-1.40,  $P=8.9 \times 10^{-9}$ ), a common missense variant  
278 (Cys130Arg) that tags the epsilon ( $\epsilon$ ) 4 haplotype in *APOE* (**Figure 2A**). This variant has  
279 established associations with both Alzheimer's disease (AD) and coronary artery disease (CAD).  
280 In addition, AD and CAD are known risk factors associated with COVID-19, and we observed an  
281 enrichment of both diseases amongst COVID-19 positive individuals (**Supplementary Table 2**).  
282 Therefore, we tested if the association between the *APOE* locus and susceptibility to COVID-19  
283 could be confounded by AD or CAD case-control status. When both diseases were added as

284 covariates to the model, we found that the association with rs429358 was significantly attenuated  
285 (OR=1.15; 95% CI=1.04-1.26;  $P=0.005$ ). These results suggest that the association between  
286 rs429358 in *APOE* and COVID-19 risk likely arose because of the enrichment of AD and CAD  
287 amongst COVID-19 cases.

288 The second locus was on chromosome 19p13.11, also associated with the phenotype  
289 COVID-19 positive vs. COVID-19 negative or unknown. The lead variant was rs117336466  
290 (MAF=0.9%; OR=2.16, 95% CI=1.64-2.85,  $P=4.5 \times 10^{-8}$ ), located in the first intron of *TMEM161A*  
291 (**Figure 2B**). This variant was not associated with risks of hospitalization (OR=0.60, 95%  
292 CI=0.33-1.09,  $P=0.094$ ) or severe disease (OR=0.58, 95% CI=0.27-1.24,  $P=0.161$ ) amongst  
293 COVID-19 positive cases.

294  
295 *Genome-wide significant associations in trans-ancestry meta-analysis.* Seven of the eight  
296 phenotypes were tested in two or more ancestries. For these, we combined results across ancestries  
297 using a fixed-effects meta-analysis, but no new loci were identified at  $P < 5 \times 10^{-8}$ .

298  
299 **Exome-wide association study of sequenced variants**

300 We tested the association between the same eight COVID-19-related phenotypes and exome  
301 sequencing variants available for a subset of 424,183 individuals from the UKB study. We tested  
302 both single variants and a burden of rare variants in protein-coding genes (see Methods).

303  
304 *Exome-wide association results.* The  $\lambda_{GC}$  for common variants (MAF>0.5%) was close to 1 for  
305 most analyses (**Supplementary Table 3**), while for rare variants (MAF<0.5%) we observed a  
306 considerable deflation of test statistics, caused by a large proportion of variants having a MAC of

307 0 in cases (*e.g.* 89% of variants in the European-only analysis of COVID-19 positive and  
308 hospitalized [N=1,065] vs. COVID-19 negative or unknown [N=403,700]). Overall, when  
309 considering both trans- and single-ancestry association analyses, we did not identify any  
310 associations with rare coding variants at a  $P < 5 \times 10^{-8}$ .

311

312 *Association results for 14 genes in the anti-viral interferon signaling pathway.* Two recent exome  
313 sequencing studies of COVID-19 suggested that rare deleterious variants in 14 genes related to  
314 interferon signaling may be implicated in more extreme clinical outcomes [14, 23]. Given our  
315 larger sample size, we examined whether there was any evidence for association between the  
316 COVID-19 hospitalization phenotype (1,184 cases vs. 422,318 controls) and a burden of rare  
317 (MAF<0.1%) pLoF variants (M1 burden test) or pLoF plus deleterious missense variants (M3  
318 burden test) in these 14 genes. We found no nominal significant associations ( $P < 0.05$ ) with any of  
319 the 14 genes (**Table 6**). Further, these results were unchanged when testing COVID-19 severe  
320 cases (N=471), or when restricting the burden tests to include variants with a MAF<1% or  
321 singleton variants (**Supplementary Table 4**). Therefore, in our analysis of the UK Biobank data,  
322 we found no evidence for an association between the 14 specific interferon signaling genes and  
323 COVID-19 outcomes.

324

325 *Association results for 36 genes located in two risk loci for COVID-19 identified by Ellinghaus et*  
326 *al. [20].* Associations with rare protein-coding variants might help pinpoint target genes of  
327 common risk variants identified in GWAS of COVID-19. To address this possibility, we focused  
328 on 36 protein-coding genes located within 500 kb of the two common risk variants identified by  
329 Ellinghaus et al. [20]: rs11385942 (locus 3p21.31) and rs657152 (locus 9q34.2). Of the 72 gene

330 burden tests performed (36 genes x 2 burden tests, considering variants with MAF<1%), four had  
331 a nominal significant association (**Supplementary Table 5**), including two protective (*CCR9* and  
332 *TSC1*) and two predisposing (*SARDH* and *XCRI*) associations. However, these associations did  
333 not remain significant after correcting for the number of tests performed (all with  
334  $P>0.05/72=0.0007$ ).

335

336 *Association results for 31 additional genes of interest.* Lastly, we performed the same analysis for  
337 31 genes that are involved in the etiology of SARS-CoV-2 infection (*e.g. ACE2, TMPRSS2*),  
338 encode therapeutic targets (*e.g. IL6R, JAK2*) or have been implicated in other immune or infectious  
339 diseases through GWAS (*e.g. IL33*). After correcting for multiple testing, there were also no  
340 significant associations with a burden of rare deleterious variants for this group of genes  
341 (**Supplementary Table 6**).

342



343 **DISCUSSION**

344 Eleven months since the first reported cases of “pneumonia of unknown cause” to the World  
345 Health Organization and six months since the declaration of the COVID-19 pandemic [34], >41  
346 million individuals have been infected with SARS-CoV-2 worldwide. Epidemiological studies  
347 have identified groups of individuals at high risk for severe disease, clinical complications and  
348 death [8, 9, 35-38]. More recently, studies focusing on host genetics have begun to identify  
349 common variants that contribute to heterogeneity in COVID-19 risk and severity [20-22].

350 Our analysis of COVID-19 in the UK Biobank indicates that, consistent with observational  
351 studies in the same UK participants [35, 37], COVID-19-related hospitalizations and deaths skew  
352 towards older, male individuals of non-European ancestry. Hypertension, obesity, CAD, type-2  
353 diabetes and dementia are among the most frequently reported COVID-19 disease comorbidities  
354 [8, 9, 35]. Similarly, after adjusting for age, we observed a 1.7-fold enrichment in both  
355 cardiovascular disease and Alzheimer’s disease among COVID-19 cases in the UK Biobank study.

356 Previous GWAS reported an association between risk of SARS-CoV-2 infection and  
357 common variants in the 3p21.31 locus [20-22]. We confirmed this association and further showed  
358 that this locus affects disease severity but not (or less so) risk of infection. We note, as have others,  
359 that the lead variant rs35652899 is in high LD with a lead expression quantitative trait locus  
360 (eQTL) for *SCL6A20* in lung tissue [39]. The *SLC6A20* gene encodes SIT1, a proline transporter  
361 expressed in the small intestine, lung, and kidney [40]. SIT1 expression and function is increased  
362 via interaction with angiotensin-converting enzyme 2 (ACE2), which is the SARS-CoV-2 receptor  
363 [41]. One intriguing hypothesis is that increased expression of *SLC6A20* in the gastrointestinal  
364 tract, lung or kidney might promote viral uptake, thus leading to increased risk of severe disease  
365 due to pathology in these tissues. Other candidate genes in the region include *LZTFL1*, which

366 encodes a cytoplasmic ciliary transport protein with expression in the lung and implicated in  
367 recessive ciliopathies with renal dysfunction as one feature, *CXCR6* and *CCR9*, chemokine  
368 receptors which mediate trafficking of T lymphocytes to the lung and GI tract, respectively, and  
369 *XCRI* on plasmacytoid dendritic cells, which mediates antigen cross presentation, potentially  
370 implicating dysregulation of immune cell trafficking and function in severe COVID-19, but further  
371 work is required to attribute the purported biological mechanisms of these genes with SARS-CoV-  
372 2 infection and disease progression of COVID-19.

373         Ellinghaus et al. [20] first reported an association between common variants in the *ABO*  
374 locus and risk of SARS-CoV-2 infection. Furthermore, ABO blood groups have been associated  
375 with severe COVID-19 [42, 43], with blood group A being associated with increased disease risk.  
376 These observations raise the possibility that genes in the *ABO* locus play a role in COVID-19  
377 susceptibility. However, genetic associations at the *ABO* locus can be confounded by population  
378 stratification [44, 45]. Furthermore, the analysis reported by Ellinghaus et al [20] used blood  
379 donors (which skew toward type O) as controls, which might have biased the association results  
380 at the *ABO* locus. As such, it is important to determine if the association with the *ABO* locus is  
381 reproducible in independent studies. First, we found no difference in representation of blood types  
382 among COVID-19 cases and controls (not shown). Second, although we did observe a directionally  
383 consistent and nominally significant association between risk of infection and the published lead  
384 variant, when we combined results from the UK Biobank with those from the discovery cohort  
385 [20], the association with this variant did not reach genome-wide significance (not shown). Third,  
386 we found no evidence for an association between this locus and disease severity. Therefore, it  
387 remains unclear whether variants in the *ABO* locus represent bona fide risk factors for COVID-19.

388 In our GWAS of imputed variants, we identified a genome-wide significant association  
389 between risk of SARS-CoV-2 infection and a variant that tags the  $\epsilon 4$  haplotype in *APOE*. Common  
390 variants in *APOE* have been previously associated with SARS-CoV-2 infection, independent of  
391 CAD, dementia and other comorbidities [46]. However, in contrast to these findings, we found  
392 that the association with *APOE* was significantly attenuated after adjusting for AD and CAD.  
393 Similar results were obtained after conditioning on AD alone (not shown). This suggests that the  
394 observed association between risk of SARS-CoV-2 infection and *APOE* in our analysis of the UK  
395 Biobank was, at least partly, confounded with AD status.

396 We also identified a putative new association between common variants on chromosome  
397 19p13.11 and risk of SARS-CoV-2 infection. However, this locus was not associated with  
398 increased risks of hospitalization or severe disease amongst COVID-19 positive individuals.  
399 Replication in independent studies is required to validate the association between 19p13.11 and  
400 risk of SARS-CoV-2 infection.

401 Lastly, we analyzed exome sequence data for a subset of 424,183 individuals in the UK  
402 Biobank to test the association between COVID-19 phenotypes and rare variants not captured by  
403 array genotyping or imputation. We found no associations at a  $P < 5 \times 10^{-8}$  with pLoF variants,  
404 missense variants or in gene-burden analyses. We then concentrated on 81 genes of interest,  
405 including 14 genes related to interferon signaling [14, 23], 36 genes in two GWAS loci [20] and  
406 31 additional genes of immunologic relevance and/or therapeutic potential. After correcting for  
407 the number of tests performed, there were no significant associations between the COVID-19  
408 hospitalization phenotype and a burden of rare deleterious variants in any of these genes. We are  
409 expanding our analysis of exome sequence data to include additional studies and will update results  
410 accordingly.

411

412 At the outset of the pandemic, testing for SARS-CoV-2 was restricted to symptomatic individuals  
413 and often performed exclusively at inpatient/outpatient care sites. Thus, this current analysis is  
414 likely weighted toward cases with demonstrable COVID-19 symptoms or clinical presentation.  
415 Broader analysis of seropositive individuals who were asymptomatic or had infections mild  
416 enough to resolve at home will be critical to identify genetic factors that might protect from severe  
417 disease, particularly among high-risk groups with comorbidities. Regardless, further genetic  
418 studies across ancestry groups will shed more light on human genetic risk factors associated with  
419 susceptibility to SARS-CoV-2 and may point to pathways and approaches for the treatment of  
420 COVID-19.

421 FIGURES

422

423 A. Locus 3p21.31 (rs11385942:GA, near the *LZTFL1* gene)

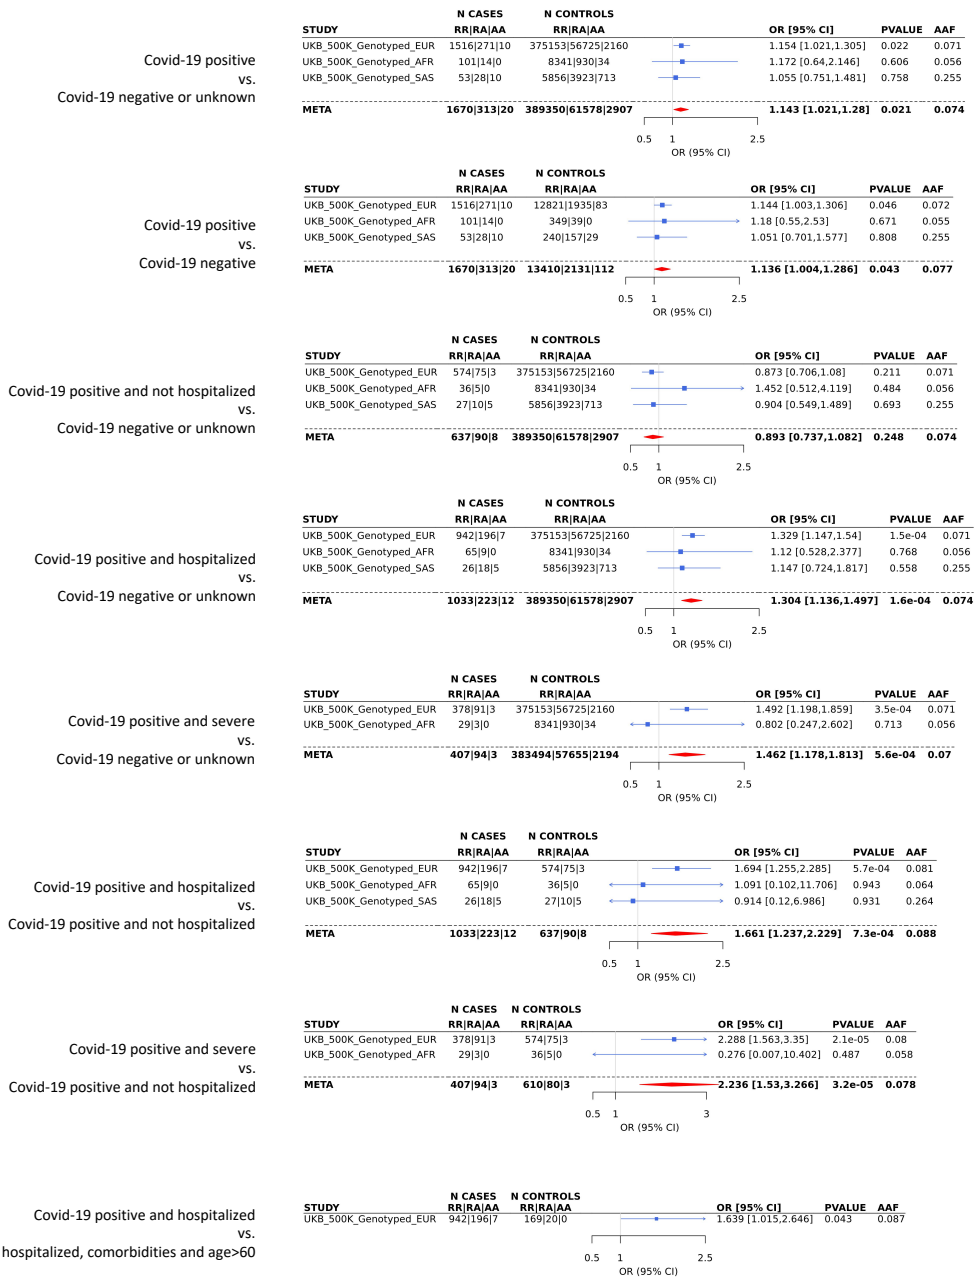

424

425

426

427 **B. Locus 9q34.2 (rs8176719:TC, in the *ABO* gene)**

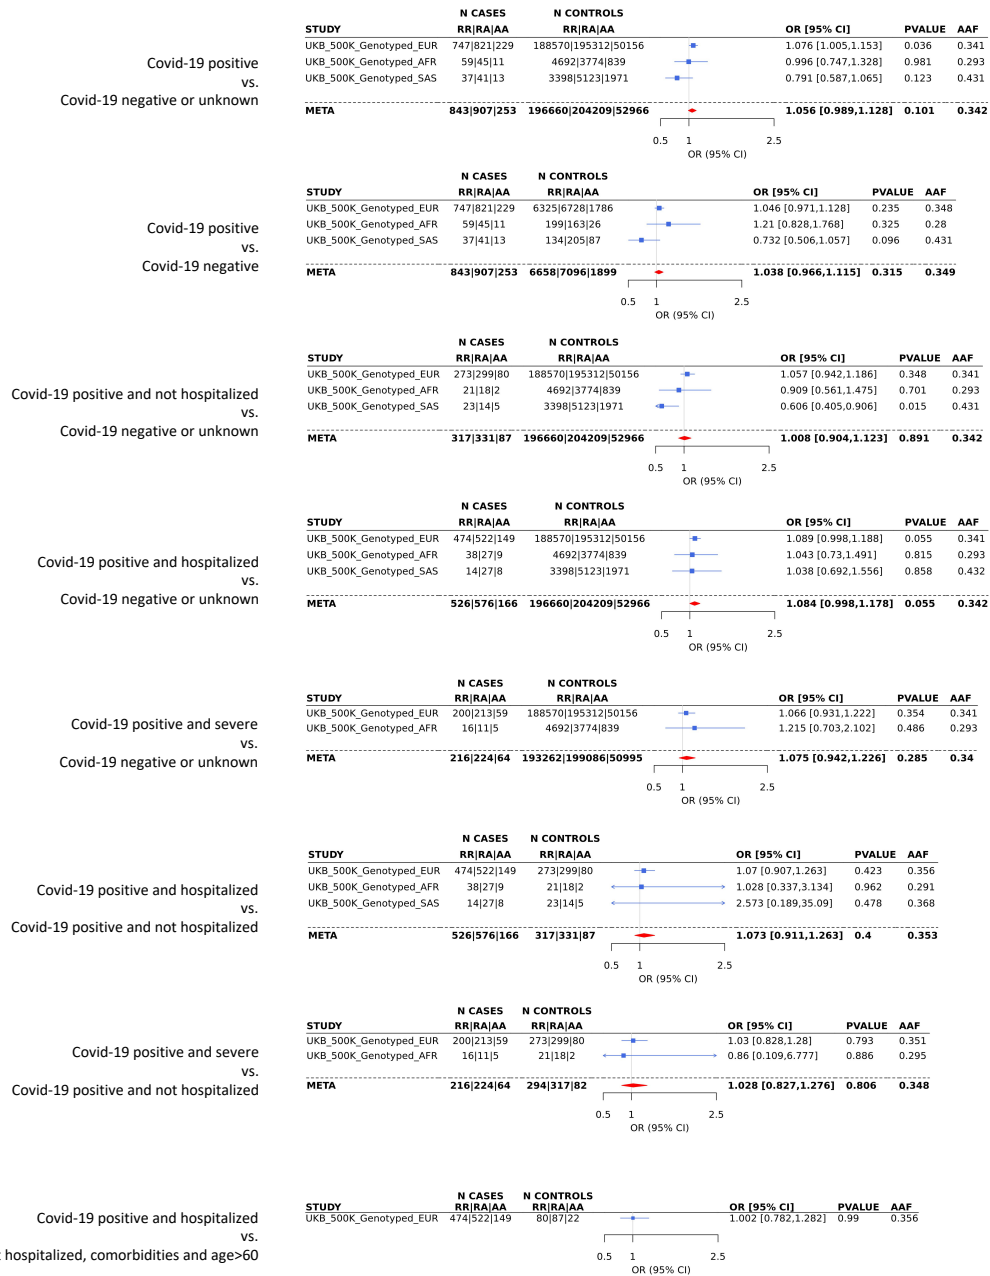

428

429 **Figure 1.** Results in the UKB for variants in two loci reported recently by Ellinghaus et al. [20] to

430 associate with risk of hospitalization with severe COVID-19. For the chromosome 9 locus, we

431 used rs8176719 as a proxy ( $r^2=0.94$ ) for the lead variant reported by Ellinghaus et al. (rs657152).

432

433 **A. Locus 19q13.32 (rs429358 in *APOE*)**

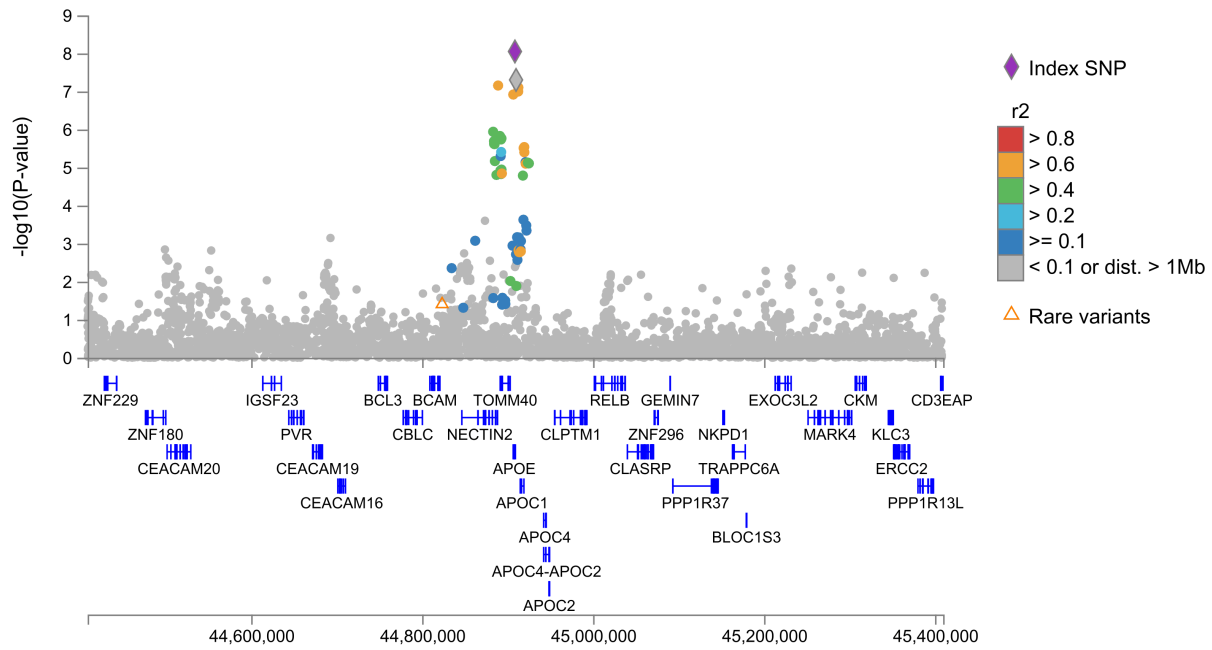

434

435 **B. Locus 19p13.11 (rs117336466 in *TMEM161A*)**

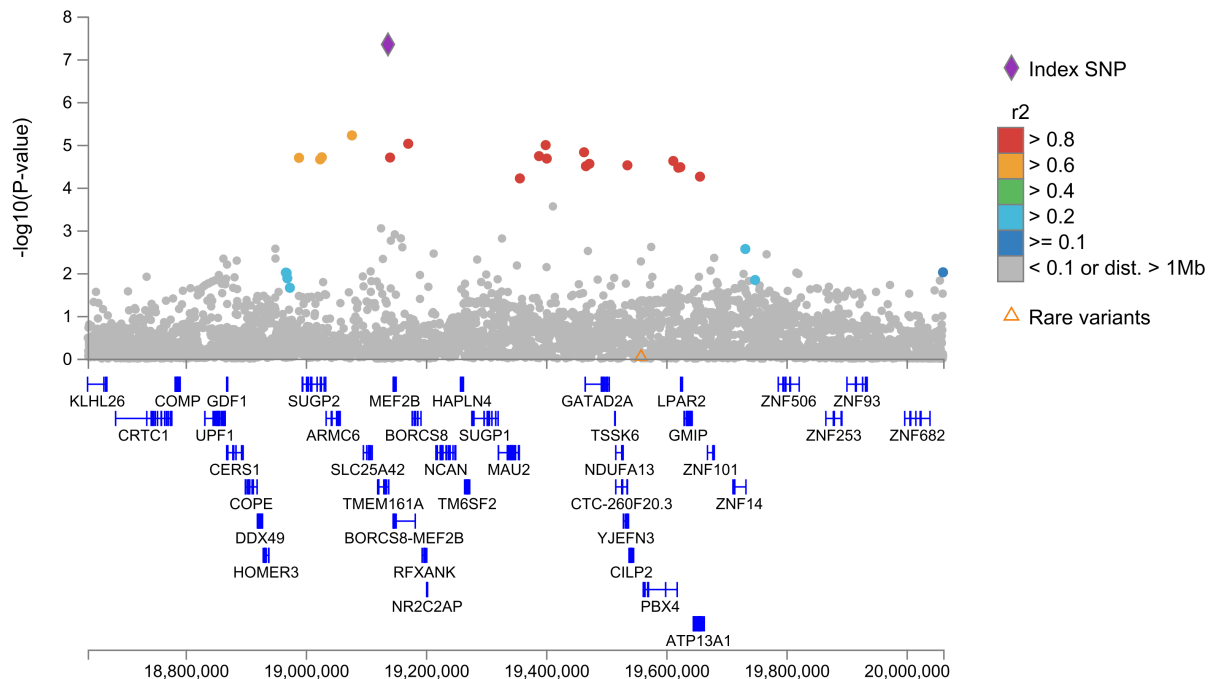

436

437

438 **Figure 2.** Regional association results for the three loci with common variants associated with  
439 COVID-19 phenotypes at  $P < 5 \times 10^{-8}$ . (A) *APOE* locus (lead variant rs429358), associated with  
440 COVID-19 positive vs. COVID-19 negative or unknown. (B) *TMEM161A* locus (lead variant  
441 rs117336466), associated with COVID-19 positive vs. COVID-19 negative or unknown. The lead  
442 variant in each locus is shown by the purple diamond. Linkage disequilibrium (LD) in these figures  
443 was estimated using genetic data from European individuals of the HapMap3 project.



444 **TABLES**

445

446 **Table 1.** Breakdown of COVID-19 status in participants of the UK Biobank study as of September

447 12, 2020.

| COVID-19 status | Positive PCR for SARS-CoV-2 | ICD10 U07 diagnosis | COVID-19-related death | Negative PCR test for SARS-CoV-2 | N      |
|-----------------|-----------------------------|---------------------|------------------------|----------------------------------|--------|
| Positive        | Yes                         | Yes                 | Yes                    | -                                | 251    |
|                 | Yes                         | Yes                 | -                      | -                                | 642    |
|                 | Yes                         | -                   | Yes                    | -                                | 42     |
|                 | Yes                         | -                   | -                      | -                                | 777    |
|                 | -                           | Yes                 | Yes                    | -                                | 16     |
|                 | -                           | Yes                 | -                      | -                                | 92     |
|                 | -                           | -                   | Yes                    | -                                | 122    |
|                 | -                           | Yes                 | Yes                    | Yes                              | 15     |
|                 | -                           | Yes                 | -                      | Yes                              | 150    |
|                 | -                           | -                   | Yes                    | Yes                              | 11     |
|                 | Total = 2118                |                     |                        |                                  |        |
| Negative        | -                           | -                   | -                      | Yes                              | 16331  |
| Unknown         | -                           | -                   | -                      | -                                | 455528 |

448

449 **Table 2.** Criteria used to define COVID-19 phenotypes for genetic association analysis.

| Phenotype                                                                                                     | Case/<br>control group | COVID-19 status                         | Hospitalized     | Severe disease* |
|---------------------------------------------------------------------------------------------------------------|------------------------|-----------------------------------------|------------------|-----------------|
| COVID-19 positive<br>vs.<br>COVID-19 negative or unknown                                                      | Cases                  | Positive                                | -                | -               |
|                                                                                                               | Controls               | Negative or unknown                     | No or NA         | No or NA        |
| COVID-19 positive<br>vs.<br>COVID-19 negative                                                                 | Cases                  | Positive                                | -                | -               |
|                                                                                                               | Controls               | Negative                                | No or NA         | No or NA        |
| COVID-19 positive and not hospitalized<br>vs.<br>COVID-19 negative or unknown                                 | Cases                  | Positive                                | No               | No              |
|                                                                                                               | Controls               | Negative or unknown                     | No or NA         | No or NA        |
| COVID-19 positive and hospitalized<br>vs.<br>COVID-19 negative or unknown                                     | Cases                  | Positive                                | Yes (or death**) | -               |
|                                                                                                               | Controls               | Negative or unknown                     | No or NA         | No or NA        |
| COVID-19 positive and severe<br>vs.<br>COVID-19 negative or unknown                                           | Cases                  | Positive                                | -                | Yes             |
|                                                                                                               | Controls               | Negative or unknown                     | No or NA         | No or NA        |
| COVID-19 positive and hospitalized<br>vs.<br>COVID-19 positive and not hospitalized                           | Cases                  | Positive                                | Yes (or death**) | -               |
|                                                                                                               | Controls               | Positive                                | No               | No              |
| COVID-19 positive and severe<br>vs.<br>COVID-19 positive and not hospitalized                                 | Cases                  | Positive                                | -                | Yes             |
|                                                                                                               | Controls               | Positive                                | No               | No              |
| COVID-19 positive and hospitalized<br>vs.<br>COVID-19 positive, not hospitalized,<br>comorbidities and age>60 | Cases                  | Positive                                | Yes (or death**) | -               |
|                                                                                                               | Controls               | Positive with co-morbidities and age>60 | No               | No              |

450 \* Severe disease: respiratory support (oxygen, ventilation) or death. \*\* A total of 175 individuals had a record of death due to  
 451 COVID-19 but had no record of hospitalization. These individuals were included as cases. A hyphen (“-”) indicates that the variable  
 452 (*i.e.* Hospitalized and Severe Disease) was not considered as inclusion criteria.

453 **Table 3.** Demographics for participants of the UK Biobank study included in the analysis.

| <b>Demographic and clinical characteristics</b>    | <b>COVID-19 positive</b> | <b>COVID-19 negative</b> | <b>COVID-19 unknown</b> |
|----------------------------------------------------|--------------------------|--------------------------|-------------------------|
| N                                                  | 2118                     | 16331                    | 455528                  |
| Female, n (%)                                      | 995 (46.9)               | 8547 (52.3)              | 252361 (55.4)           |
| Median age at assessment, years (95% CI)           | 59 (51,67)               | 60 (53-66)               | 57 (50, 63)             |
| Median body mass index, kg/m <sup>2</sup> (95% CI) | 28 (24, 31)              | 27 (24, 30)              | 26 (23, 29)             |
| Median C-reactive protein levels (95% CI)          | 1.6 (0.35, 2.9)          | 1.5 (0.3, 2.7)           | 1.3 (0.3, 0.3)          |
| Number of current/past smokers, n (%)              | 1098 (51.8)              | 8228 (50.3)              | 199923 (43.9)           |
| Median number of inpatient ICD10 3D codes (95% CI) | 12 (3, 21)               | 12 (3, 20)               | 8 (2, 14)               |
| Median Townsend deprivation index (95% CI)         | -1.14 (-3.7, 1.46)       | -1.9 (-4.2, 0.4)         | -2.17 (-4.2, -0.12)     |
| <b>Ancestry</b>                                    |                          |                          |                         |
| African, n (%)                                     | 115 (5.4)                | 388 (2.4)                | 8921 (1.9)              |
| East Asian, n (%)                                  | 17 (0.8)                 | 65 (0.4)                 | 2213 (0.4)              |
| South Asian, n (%)                                 | 92 (4.3)                 | 428 (2.6)                | 10125 (2.2)             |
| European, n (%)                                    | 1798 (84.9)              | 14864 (91.0)             | 420007 (92.2)           |
| <b>Co-morbidities</b>                              |                          |                          |                         |
| Hypertension, n (%)                                | 1169 (55.2)              | 8917 (54.6)              | 200277 (43.9)           |
| Coronary Disease, n (%)                            | 229 (10.8)               | 1743 (10.6)              | 26015 (5.7)             |
| Heart Failure, n (%)                               | 100 (4.7)                | 563 (3.4)                | 5317 (1.1)              |
| Type 2 Diabetes, n (%)                             | 320 (15.1)               | 2013 (12.3)              | 30581 (6.7)             |
| Chronic kidney disease, n (%)                      | 92 (4.3)                 | 573 (3.5)                | 6615 (1.4)              |
| Asthma, n (%)                                      | 340 (16.0)               | 2895 (17.7)              | 64315 (14.1)            |
| COPD, n (%)                                        | 159 (7.5)                | 1042 (6.4)               | 10661 (2.3)             |
| Alzheimer's disease, n (%)                         | 42 (1.9)                 | 69 (0.42)                | 359 (0.07)              |

454

455 **Table 4.** Prevalence of co-morbidities, stratified by ancestry.

| Disease                       | COVID-19 positive |               |                  | Covid-19 negative or unknown |
|-------------------------------|-------------------|---------------|------------------|------------------------------|
|                               | All               | Hospitalized* | Not hospitalized |                              |
| African ancestry              |                   |               |                  |                              |
| Total N                       | 115               | 74            | 41               | 9309                         |
| Hypertension, n (%)           | 76 (66.1)         | 51 (68.9)     | 25 (60.9)        | 4561 (48.9)                  |
| Coronary Disease, n (%)       | 5 (4.4)           | 4 (5.4)       | 1 (2.4)          | 329 (3.5)                    |
| Heart Failure, n (%)          | 6 (5.2)           | 6 (8.1)       | 0                | 98 (1.1)                     |
| Type 2 Diabetes, n (%)        | 31 (26.9)         | 26 (35.1)     | 5 (12.2)         | 1325 (14.2)                  |
| Chronic kidney disease, n (%) | 4 (3.4)           | 4 (5.4)       | 0                | 179 (1.9)                    |
| Asthma, n (%)                 | 16 (13.9)         | 10 (13.5)     | 6 (14.6)         | 1332 (14.3)                  |
| COPD, n (%)                   | 3 (2.6)           | 3 (4.1)       | 0                | 98 (1.1)                     |
| Alzheimer's disease, n (%)    | 0                 | 0             | 0                | 7 (0.07)                     |
| European ancestry             |                   |               |                  |                              |
| Total N                       | 1798              | 1145          | 653              | 434871                       |
| Hypertension, n (%)           | 993 (55.2)        | 704 (61.4)    | 289 (44.2)       | 191906 (44.1)                |
| Coronary Disease, n (%)       | 205 (11.4)        | 166 (14.5)    | 39 (5.9)         | 25512 (5.8)                  |
| Heart Failure, n (%)          | 85 (4.7)          | 75 (6.5)      | 10 (1.5)         | 5396 (1.2)                   |
| Type 2 Diabetes, n (%)        | 267 (14.8)        | 211 (18.4)    | 56 (8.5)         | 27611 (6.3)                  |
| Chronic kidney disease, n (%) | 78 (4.3)          | 64 (5.6)      | 14 (2.1)         | 6563 (1.5)                   |
| Asthma, n (%)                 | 295 (16.4)        | 189 (16.5)    | 106 (16.2)       | 61755 (14.2)                 |
| COPD, n (%)                   | 151 (8.4)         | 131 (11.4)    | 20 (3.1)         | 10949 (2.5)                  |
| Alzheimer's disease, n (%)    | 41 (2.3)          | 26 (2.7)      | 15 (2.3)         | 385 (0.08)                   |
| South Asian ancestry          |                   |               |                  |                              |
| Total N                       | 92                | 50            | 42               | 10553                        |
| Hypertension, n (%)           | 47 (51.1)         | 26 (52)       | 21 (50)          | 5149 (48.7)                  |
| Coronary Disease, n (%)       | 10 (10.8)         | 6 (12)        | 4 (9.5)          | 994 (9.4)                    |
| Heart Failure, n (%)          | 5 (5.4)           | 3 (6)         | 2 (4.7)          | 167 (1.6)                    |
| Type 2 Diabetes, n (%)        | 25 (27.1)         | 16 (32)       | 9 (21.4)         | 2308 (21.9)                  |
| Chronic kidney disease, n (%) | 6 (6.5)           | 6 (12)        | 0                | 202 (1.9)                    |
| Asthma, n (%)                 | 17 (18.4)         | 10 (20)       | 7 (16.6)         | 1691 (16.0)                  |
| COPD, n (%)                   | 3 (3.2)           | 2 (4)         | 1 (2.3)          | 185 (1.7)                    |
| Alzheimer's disease, n (%)    | 0                 | 0             | 0                | 9 (0.08)                     |

456 \*A total of 175 individuals had a record of death due to COVID-19 but had no record of hospitalization. These individuals were  
 457 included in the "Hospitalized" group in this analysis.

458 **Table 5.** Case-control sample size for eight COVID-19-related phenotypes tested in genetic  
 459 association analyses in the UK Biobank study.

| Phenotype                                                                                                     | Ancestry | N cases |       | N controls |         |
|---------------------------------------------------------------------------------------------------------------|----------|---------|-------|------------|---------|
|                                                                                                               |          | Imputed | Exome | Imputed    | Exome   |
| COVID-19 positive<br>vs.<br>COVID-19 negative or unknown                                                      | Combined | 2003    | 1865  | 453,835    | 422,318 |
|                                                                                                               | AFR      | 115     | 110   | 9305       | 8599    |
|                                                                                                               | EUR      | 1797    | 1673  | 434,038    | 404,300 |
|                                                                                                               | SAS      | 91      | 82    | 10,492     | 9419    |
| COVID-19 positive<br>vs.<br>COVID-19 negative                                                                 | Combined | 2003    | 1865  | 15,653     | 14,519  |
|                                                                                                               | AFR      | 115     | 110   | 388        | 361     |
|                                                                                                               | EUR      | 1797    | 1673  | 14,839     | 13,765  |
|                                                                                                               | SAS      | 91      | 82    | 426        | 393     |
| COVID-19 positive and not hospitalized<br>vs.<br>COVID-19 negative or unknown                                 | Combined | 734     | 681   | 453,835    | 422,318 |
|                                                                                                               | AFR      | 41      | 39    | 9305       | 8599    |
|                                                                                                               | EUR      | 652     | 605   | 434,038    | 404,300 |
|                                                                                                               | SAS      | 42      | 37    | 10,492     | 9419    |
| COVID-19 positive and hospitalized<br>vs.<br>COVID-19 negative or unknown                                     | Combined | 1268    | 1184  | 453,835    | 422,318 |
|                                                                                                               | AFR      | 74      | 71    | 9305       | 8599    |
|                                                                                                               | EUR      | 1145    | 1068  | 434,038    | 404,300 |
|                                                                                                               | SAS      | 49      | 45    | 10,492     | 9419    |
| COVID-19 positive and severe<br>vs.<br>COVID-19 negative or unknown                                           | Combined | -       | 471   | 443,343    | 412,899 |
|                                                                                                               | AFR      | 32      | 32    | 9305       | 8599    |
|                                                                                                               | EUR      | -       | 439   | 434,038    | 404,300 |
| COVID-19 positive and hospitalized<br>vs.<br>COVID-19 positive and not hospitalized                           | Combined | 1268    | 1068  | 735        | 605     |
|                                                                                                               | AFR      | 74      | -     | 41         | -       |
|                                                                                                               | EUR      | 1145    | 1068  | 652        | 605     |
|                                                                                                               | SAS      | 49      | -     | 42         | -       |
| COVID-19 positive and severe<br>vs.<br>COVID-19 positive and not hospitalized                                 | Combined | 504     | 439   | 693        | 605     |
|                                                                                                               | AFR      | 32      | -     | 41         | -       |
|                                                                                                               | EUR      | 472     | 439   | 652        | 605     |
| COVID-19 positive and hospitalized<br>vs.<br>COVID-19 positive, not hospitalized,<br>comorbidities and age>60 | EUR      | 1145    | 1068  | 189        | 174     |

460 SAS case and control sample sizes for both severe COVID-19 sample sizes fell below the  
 461 minimum case threshold to properly analyze. Dashes (-) in cells indicate the sample sizes were  
 462 also too small for analysis.

463

464 **Table 6.** Association between the phenotype COVID-19 positive and hospitalized (N=1,184) vs  
 465 COVID-19 negative or unknown (N=422,318) and 14 genes related to interferon signaling that  
 466 were recently reported to contain rare (MAF<0.1%), deleterious variants in patients with severe  
 467 COVID-19 [14, 23].

| Gene           | Burden test | Odds Ratio [95% CI] | P-value | Cases RR RA AA | Controls RR RA AA | AAF      |
|----------------|-------------|---------------------|---------|----------------|-------------------|----------|
| <i>STAT2</i>   | M3          | 2.34 (1.0, 5.5)     | 0.050   | 1176 8 0       | 421086 1231 1     | 1.47E-03 |
| <i>UNC93B1</i> | M3          | 2.07 (0.93, 4.58)   | 0.073   | 1177 7 0       | 420917 1401 0     | 1.66E-03 |
| <i>IRF7</i>    | M3          | 2.15 (0.8, 5.74)    | 0.129   | 1179 5 0       | 421275 1043 0     | 1.24E-03 |
| <i>IFNAR1</i>  | M3          | 0.37 (0.08, 1.68)   | 0.195   | 1184 0 0       | 421811 507 0      | 5.99E-04 |
| <i>UNC93B1</i> | M1          | 3.4 (0.43, 26.93)   | 0.247   | 1066 2 0       | 403926 374 0      | 4.64E-04 |
| <i>IRF7</i>    | M1          | 2.07 (0.6, 7.12)    | 0.247   | 1181 3 0       | 421674 644 0      | 7.64E-04 |
| <i>TLR7</i>    | M3          | 0.52 (0.15, 1.77)   | 0.297   | 1184 0 0       | 421856 334 128    | 6.97E-04 |
| <i>IFNAR1</i>  | M1          | 0.37 (0.04, 3.77)   | 0.404   | 1139 0 0       | 412664 235 0      | 2.84E-04 |
| <i>TLR3</i>    | M1          | 0.37 (0.02, 6.06)   | 0.488   | 1184 0 0       | 422141 177 0      | 2.09E-04 |
| <i>STAT1</i>   | M3          | 0.37 (0.02, 7.77)   | 0.520   | 1184 0 0       | 422137 181 0      | 2.14E-04 |
| <i>STAT2</i>   | M1          | 0.36 (0.01, 8.76)   | 0.529   | 1068 0 0       | 404195 105 0      | 1.30E-04 |
| <i>TRAF3</i>   | M3          | 0.37 (0.01, 10.13)  | 0.553   | 1139 0 0       | 412750 149 0      | 1.80E-04 |
| <i>IRF3</i>    | M1          | 1.5 (0.29, 7.66)    | 0.625   | 1182 2 0       | 422001 317 0      | 3.77E-04 |
| <i>TICAM1</i>  | M1          | 0.37 (0.0, 28.86)   | 0.652   | 1068 0 0       | 404205 95 0       | 1.17E-04 |
| <i>TICAM1</i>  | M3          | 0.37 (0.0, 28.86)   | 0.652   | 1068 0 0       | 404205 95 0       | 1.17E-04 |
| <i>TBK1</i>    | M1          | 0.36 (0.0, 31.85)   | 0.658   | 1068 0 0       | 404231 69 0       | 8.51E-05 |
| <i>IKBKG</i>   | M3          | 0.43 (0.0, 64.35)   | 0.744   | 1113 0 0       | 413640 70 9       | 1.06E-04 |
| <i>STAT1</i>   | M1          | 0.37 (0.0, 375.39)  | 0.776   | 1068 0 0       | 404268 32 0       | 3.95E-05 |
| <i>TBK1</i>    | M3          | 0.84 (0.24, 2.97)   | 0.787   | 1182 2 0       | 421450 867 1      | 1.03E-03 |
| <i>TLR3</i>    | M3          | 0.9 (0.39, 2.06)    | 0.803   | 1179 5 0       | 420322 1995 1     | 2.36E-03 |
| <i>IRF9</i>    | M1          | 0.37 (0.0, 1526.67) | 0.813   | 1068 0 0       | 404275 25 0       | 3.08E-05 |
| <i>IRF9</i>    | M3          | 0.37 (0.0, 1526.67) | 0.813   | 1068 0 0       | 404275 25 0       | 3.08E-05 |
| <i>IKBKG</i>   | M1          | 0.49 (0.0, 369.27)  | 0.834   | 1113 0 0       | 413679 31 9       | 5.91E-05 |
| <i>TRAF3</i>   | M1          | 0.37 (0.0, 10210.6) | 0.847   | 1068 0 0       | 404284 16 0       | 1.97E-05 |
| <i>TLR7</i>    | M1          | 0.51 (0.0, 617.09)  | 0.851   | 1068 0 0       | 404282 12 6       | 2.96E-05 |
| <i>IRF3</i>    | M3          | 1.12 (0.26, 4.83)   | 0.874   | 1182 2 0       | 421885 433 0      | 5.14E-04 |
| <i>IFNAR2</i>  | M1          | 1.04 (0.14, 7.7)    | 0.968   | 1183 1 0       | 421965 353 0      | 4.18E-04 |
| <i>IFNAR2</i>  | M3          | 1.01 (0.14, 7.18)   | 0.996   | 1183 1 0       | 421949 369 0      | 4.37E-04 |

468

469 RR: individuals who were homozygote for the reference allele for all variants included in the  
470 burden test. RA: individuals who were heterozygote for at least one variant included in the  
471 burden test. AA: individuals who were homozygote for the alternative allele for at least one  
472 variant included in the burden test. The genes *TLR7* and *IKBKG* are located on the X  
473 chromosome; individuals counted as homozygote for the alternative allele include hemizygous  
474 males.

475 \* M1: burden of rare (MAF<0.1%) pLoF variants. M3: burden of rare (MAF<0.1%) pLoF or  
476 missense variants that are predicted to be deleterious by 5 out of 5 algorithms.

477

478 **SUPPLEMENTARY TABLES**

479

480 **Supplementary Tables 1 to 6 are provided in a separate document.**

481

482 **Supplementary Table 1.** Genomic inflation factor ( $\lambda_{GC}$ ) observed in the analysis of imputed  
483 variants for each of the eight phenotypes tested.

484

485 **Supplementary Table 2.** Association between COVID-19 phenotypes and both cardiovascular  
486 disease and Alzheimer's disease.

487

488 **Supplementary Table 3.** Genomic inflation factor ( $\lambda_{GC}$ ) observed in the analysis of exome  
489 sequence variants for each of the eight phenotypes tested.

490

491 **Supplementary Table 4.** Results from burden association tests for 14 genes related to interferon  
492 signaling and recently reported to contain rare (MAF<0.1%), deleterious variants in patients with  
493 severe COVID-19 [14, 23].

494

495 **Supplementary Table 5.** Association between the phenotype COVID-19 positive and  
496 hospitalized (N=1,184) vs COVID-19 negative or unknown (N=422,318) and 36 genes located in  
497 two loci identified in a previous GWAS of severe COVID-19 [20].

498

499 **Supplementary Table 6.** Association between the phenotype COVID-19 positive and  
500 hospitalized (N=1,184) vs COVID-19 negative or unknown (N=422,318) and 31 genes that are



501 involved in the etiology of SARS-CoV-2, encode therapeutic targets or have been implicated in  
502 other immune or infectious diseases through GWAS.

503 **References**

- 504 1. Zhu, N., et al., *A Novel Coronavirus from Patients with Pneumonia in China, 2019*. New  
505 England Journal of Medicine, 2020. **382**(8): p. 727-733.
- 506 2. Coronaviridae Study Group of the International Committee on Taxonomy of V., *The*  
507 *species Severe acute respiratory syndrome-related coronavirus: classifying 2019-nCoV*  
508 *and naming it SARS-CoV-2*. Nat Microbiol, 2020. **5**(4): p. 536-544.
- 509 3. Guan, W.J., et al., *Clinical Characteristics of Coronavirus Disease 2019 in China*. N  
510 Engl J Med, 2020. **382**(18): p. 1708-1720.
- 511 4. Kimball, A., et al., *Asymptomatic and Presymptomatic SARS-CoV-2 Infections in*  
512 *Residents of a Long-Term Care Skilled Nursing Facility - King County, Washington,*  
513 *March 2020*. MMWR Morb Mortal Wkly Rep, 2020. **69**(13): p. 377-381.
- 514 5. Bai, Y., et al., *Presumed Asymptomatic Carrier Transmission of COVID-19*. JAMA,  
515 2020. **323**(14): p. 1406-1407.
- 516 6. Richardson, S., et al., *Presenting Characteristics, Comorbidities, and Outcomes Among*  
517 *5700 Patients Hospitalized With COVID-19 in the New York City Area*. Jama, 2020.  
518 **323**(20): p. 2052-2059.
- 519 7. Atkins, J.L., et al., *PREEXISTING COMORBIDITIES PREDICTING SEVERE COVID-*  
520 *19 IN OLDER ADULTS IN THE UK BIOBANK COMMUNITY COHORT*. medRxiv,  
521 2020: p. 2020.05.06.20092700.
- 522 8. Zhou, F., et al., *Clinical course and risk factors for mortality of adult inpatients with*  
523 *COVID-19 in Wuhan, China: a retrospective cohort study*. Lancet, 2020. **395**(10229): p.  
524 1054-1062.

- 525 9. Cummings, M.J., et al., *Epidemiology, clinical course, and outcomes of critically ill*  
526 *adults with COVID-19 in New York City: a prospective cohort study*. Lancet, 2020.  
527 **395**(10239): p. 1763-1770.
- 528 10. Ciancanelli, M.J., et al., *Infectious disease. Life-threatening influenza and impaired*  
529 *interferon amplification in human IRF7 deficiency*. Science, 2015. **348**(6233): p. 448-53.
- 530 11. Casanova, J.L., *Severe infectious diseases of childhood as monogenic inborn errors of*  
531 *immunity*. Proc Natl Acad Sci U S A, 2015. **112**(51): p. E7128-37.
- 532 12. Dupuis, S., et al., *Impairment of mycobacterial but not viral immunity by a germline*  
533 *human STAT1 mutation*. Science, 2001. **293**(5528): p. 300-3.
- 534 13. Jouanguy, E., et al., *Interferon-gamma-receptor deficiency in an infant with fatal bacille*  
535 *Calmette-Guerin infection*. N Engl J Med, 1996. **335**(26): p. 1956-61.
- 536 14. van der Made, C.I., et al., *Presence of Genetic Variants Among Young Men With Severe*  
537 *COVID-19*. JAMA, 2020. **324**(7): p. 663-673.
- 538 15. Zhang, S.Y., et al., *Severe COVID-19 in the young and healthy: monogenic inborn errors*  
539 *of immunity?* Nat Rev Immunol, 2020. **20**(8): p. 455-456.
- 540 16. Hansen, J., et al., *Studies in humanized mice and convalescent humans yield a SARS-*  
541 *CoV-2 antibody cocktail*. Science, 2020. **369**(6506): p. 1010-1014.
- 542 17. Baum, A., et al., *Antibody cocktail to SARS-CoV-2 spike protein prevents rapid*  
543 *mutational escape seen with individual antibodies*. Science, 2020. **369**(6506): p. 1014-  
544 1018.
- 545 18. Samson, M., et al., *Resistance to HIV-1 infection in caucasian individuals bearing mutant*  
546 *alleles of the CCR-5 chemokine receptor gene*. Nature, 1996. **382**(6593): p. 722-5.

- 547 19. Thorven, M., et al., *A homozygous nonsense mutation (428G-->A) in the human secretor*  
548 *(FUT2) gene provides resistance to symptomatic norovirus (GGII) infections.* J Virol,  
549 2005. **79**(24): p. 15351-5.
- 550 20. Ellinghaus, D., et al., *Genomewide Association Study of Severe Covid-19 with*  
551 *Respiratory Failure.* New England Journal of Medicine, 2020.
- 552 21. Shelton, J.F., et al., *Trans-ethnic analysis reveals genetic and non-genetic associations*  
553 *with COVID-19 susceptibility and severity.* medRxiv, 2020: p. 2020.09.04.20188318.
- 554 22. Pairo-Castineira, E., et al., *Genetic mechanisms of critical illness in Covid-19.* medRxiv,  
555 2020: p. 2020.09.24.20200048.
- 556 23. Zhang, Q., et al., *Inborn errors of type I IFN immunity in patients with life-threatening*  
557 *COVID-19.* Science, 2020. **370**(6515): p. eabd4570.
- 558 24. Bycroft, C., et al., *The UK Biobank resource with deep phenotyping and genomic data.*  
559 Nature, 2018. **562**(7726): p. 203-209.
- 560 25. Van Hout, C.V., et al., *Exome sequencing and characterization of 49,960 individuals in*  
561 *the UK Biobank.* Nature, 2020.
- 562 26. Zerbino, D.R., et al., *Ensembl 2018.* Nucleic Acids Research, 2017. **46**(D1): p. D754-  
563 D761.
- 564 27. Vaser, R., et al., *SIFT missense predictions for genomes.* Nat Protoc, 2016. **11**(1): p. 1-9.
- 565 28. Adzhubei, I., D.M. Jordan, and S.R. Sunyaev, *Predicting functional effect of human*  
566 *missense mutations using PolyPhen-2.* Curr Protoc Hum Genet, 2013. **7**(1): p. 7.20.1-  
567 7.20.41.
- 568 29. Chun, S. and J.C. Fay, *Identification of deleterious mutations within three human*  
569 *genomes.* Genome research, 2009. **19**(9): p. 1553-1561.

- 570 30. Schwarz, J.M., et al., *MutationTaster evaluates disease-causing potential of sequence*  
571 *alterations*. Nat Methods, 2010. 7(8): p. 575-6.
- 572 31. Mbatchou, J., et al., *Computationally efficient whole genome regression for quantitative*  
573 *and binary traits*. bioRxiv, 2020: p. 2020.06.19.162354.
- 574 32. Mathieson, I. and G. McVean, *Differential confounding of rare and common variants in*  
575 *spatially structured populations*. Nature Genetics, 2012. 44(3): p. 243-246.
- 576 33. Zaidi, A.A. and I. Mathieson, *Demographic history impacts stratification in polygenic*  
577 *scores*. bioRxiv, 2020: p. 2020.07.20.212530.
- 578 34. *W.H.O. Rolling updates on coronavirus disease (COVID-19)*. Available from:  
579 [https://www.who.int/emergencies/diseases/novel-coronavirus-2019/events-as-they-](https://www.who.int/emergencies/diseases/novel-coronavirus-2019/events-as-they-happen)  
580 [happen](https://www.who.int/emergencies/diseases/novel-coronavirus-2019/events-as-they-happen).
- 581 35. Chudasama, Y.V., et al., *Multimorbidity and SARS-CoV-2 infection in UK Biobank*.  
582 *Diabetes Metab Syndr*, 2020. 14(5): p. 775-776.
- 583 36. Gold, J.A.W., et al., *Characteristics and Clinical Outcomes of Adult Patients*  
584 *Hospitalized with COVID-19 - Georgia, March 2020*. MMWR Morb Mortal Wkly Rep,  
585 2020. 69(18): p. 545-550.
- 586 37. Niedzwiedz, C.L., et al., *Ethnic and socioeconomic differences in SARS-CoV-2 infection:*  
587 *prospective cohort study using UK Biobank*. BMC Med, 2020. 18(1): p. 160.
- 588 38. Price-Haywood, E.G., et al., *Hospitalization and Mortality among Black Patients and*  
589 *White Patients with Covid-19*. N Engl J Med, 2020. 382(26): p. 2534-2543.
- 590 39. Hao, K., et al., *Lung eQTLs to help reveal the molecular underpinnings of asthma*. PLoS  
591 Genet, 2012. 8(11): p. e1003029.

- 592 40. Lonsdale, J., et al., *The Genotype-Tissue Expression (GTEx) project*. Nature Genetics,  
593 2013. **45**(6): p. 580-585.
- 594 41. Vuille-dit-Bille, R.N., et al., *Human intestine luminal ACE2 and amino acid transporter*  
595 *expression increased by ACE-inhibitors*. Amino Acids, 2015. **47**(4): p. 693-705.
- 596 42. Zhao, J., et al., *Relationship between the ABO Blood Group and the COVID-19*  
597 *Susceptibility*. Clin Infect Dis, 2020.
- 598 43. Li, J., et al., *Association between ABO blood groups and risk of SARS-CoV-2 pneumonia*.  
599 Br J Haematol, 2020. **190**(1): p. 24-27.
- 600 44. Thomson, G. and W.F. Bodmer, *Letter: Population stratification as an explanation of IQ*  
601 *and ABO association*. Nature, 1975. **254**(5498): p. 363-4.
- 602 45. Mourant, A.E., K. Domaniewska-Sobczak, and A.C. Kopec, *The distribution of the*  
603 *human blood groups and other polymorphisms*. 2nd ed. ed. 1976: London : Oxford  
604 university press.
- 605 46. Kuo, C.L., et al., *APOE e4 genotype predicts severe COVID-19 in the UK Biobank*  
606 *community cohort*. J Gerontol A Biol Sci Med Sci, 2020.

607 **SUPPLEMENTARY TEXT**

608

609 **Regeneron Genetics Center (RGC) Research Team and Contribution Statements**

610 All authors/contributors are listed in alphabetical order.

611

612 **RGC Management and Leadership Team**

613 Goncalo Abecasis, Ph.D., Aris Baras, M.D., Michael Cantor, M.D., Giovanni Coppola, M.D.,

614 Aris Economides, Ph.D., Luca A. Lotta, M.D., Ph.D., John D. Overton, Ph.D., Jeffrey G. Reid,

615 Ph.D., Alan Shuldiner, M.D.

616 Contribution: All authors contributed to securing funding, study design and oversight. All

617 authors reviewed the final version of the manuscript.

618

619 **Sequencing and Lab Operations**

620 Christina Beechert, Caitlin Forsythe, M.S., Erin D. Fuller, Zhenhua Gu, M.S., Michael Lattari,

621 Alexander Lopez, M.S., John D. Overton, Ph.D., Thomas D. Schleicher, M.S., Maria

622 Sotiropoulos Padilla, M.S., Louis Widom, Sarah E. Wolf, M.S., Manasi Pradhan, M.S., Kia

623 Manoochehri, Ricardo H. Ulloa.

624 Contribution: C.B., C.F., A.L., and J.D.O. performed and are responsible for sample genotyping.

625 C.B, C.F., E.D.F., M.L., M.S.P., L.W., S.E.W., A.L., and J.D.O. performed and are responsible

626 for exome sequencing. T.D.S., Z.G., A.L., and J.D.O. conceived and are responsible for

627 laboratory automation. M.P., K.M., R.U., and J.D.O are responsible for sample tracking and the

628 library information management system.

629

630 **Clinical Informatics**

631 Nilanjana Banerjee, Ph.D., Michael Cantor, M.D. M.A., Dadong Li, Ph.D., Deepika Sharma,

632 MHI

633 Contribution: All authors contributed to the development and validation of clinical phenotypes

634 used to identify study subjects and (when applicable) controls.

635

636 **Genome Informatics**

637 Xiaodong Bai, Ph.D., Suganthi Balasubramanian, Ph.D., Andrew Blumenfeld, Gisu Eom, Lukas

638 Habegger, Ph.D., Alicia Hawes, B.S., Shareef Khalid, Jeffrey G. Reid, Ph.D., Evan K. Maxwell,

639 Ph.D., William Salerno, Ph.D., Jeffrey C. Staples, Ph.D.

640 Contribution: X.B., A.H., W.S. and J.G.R. performed and are responsible for analysis needed to

641 produce exome and genotype data. G.E. and J.G.R. provided compute infrastructure

642 development and operational support. S.B., and J.G.R. provide variant and gene annotations and

643 their functional interpretation of variants. E.M., J.S., A.B., L.H., J.G.R. conceived and are

644 responsible for creating, developing, and deploying analysis platforms and computational

645 methods for analyzing genomic data.

646

647 **Analytical Genetics**

648 Gonçalo R. Abecasis, Ph.D., Joshua Backman, Ph.D., Manuel A. Ferreira, Ph.D., Lauren Gurski,

649 Jack A. Kosmicki, Ph.D., Alexander Li, Ph.D., Adam Locke, Ph.D., Anthony Marcketta,

650 Jonathan Marchini, Ph.D., Joelle Mbatchou, Ph.D., Shane McCarthy, Ph.D., Colm O'Dushlaine,

651 Ph.D., Dylan Sun, Kyoko Watanabe, Ph.D.



652 Contribution: J.A.K. and M.A.F. performed association analyses and led manuscript writing  
653 group. J.B. identified low-quality variants in exome sequence data using machine learning. L.G.  
654 and K.W. helped with visualization of association results. A.Li., A.L., A.M. and D.S. prepared  
655 the analytical pipelines to perform association analyses. J.M. and J.M. developed and helped  
656 deploy REGENIE. S.M. and C.O'D. helped defined COVID-19 phenotypes. G.R.A. supervised  
657 all analyses. All authors contributed to and reviewed the final version of the manuscript.

658

659 **Immune, Respiratory, and Infectious Disease Therapeutic Area Genetics**

660 Julie E. Horowitz, PhD.

661 Contribution: J.E.H. helped defined COVID-19 phenotypes, interpret association results and led  
662 the manuscript writing group.

663

664 **Research Program Management**

665 Marcus B. Jones, Ph.D., Michelle LeBlanc, Ph.D., Jason Mighty, Ph.D., Lyndon J. Mitnaul,  
666 Ph.D.

667 Contribution: All authors contributed to the management and coordination of all research  
668 activities, planning and execution. All authors contributed to the review process for the final  
669 version of the manuscript.

670

671 **UK Biobank Exome Sequencing Consortium Research Team**

672

673 **<sup>1</sup>Bristol Myers Squibb**

674 Oleg Moiseyenko, Carlos Rios, Saurabh Saha

675

676 **<sup>2</sup>Regeneron Pharmaceuticals Inc.**

677 Listed in pages 38 to 40.

678

679 **<sup>3</sup>Biogen Inc.**

680 Sally John, Chia-Yen Chen, David Sexton, Paola G. Bronson, Christopher D. Whelan, Varant

681 Kupelian, Eric Marshall, Timothy Swan, Susan Eaton, Jimmy Z. Liu, Stephanie Loomis, Megan

682 Jensen, Saranya Duraisamy, Ellen A. Tsai, Heiko Runz

683

684 **<sup>4</sup>Alnylam Pharmaceuticals**

685 Aimee M. Deaton, Margaret M. Parker, Lucas D. Ward, Alexander O. Flynn-Carroll, Greg

686 Hinkle, Paul Nioi

687

688 **<sup>5</sup>AstraZeneca**

689 Caroline Austin (Business Development); Ruth March (Precision Medicine & Biosamples);

690 Menelas N. Pangalos (BioPharmaceuticals R&D); Adam Platt (Translational Science &

691 Experimental Medicine, Research and Early Development, Respiratory and Immunology); Mike

692 Snowden (Discovery Sciences); Athena Matakidou, Sebastian Wasilewski, Quanli Wang, Sri

693 Deevi, Keren Carss, Katherine Smith (Centre for Genomics Research, Discovery Sciences,  
694 BioPharmaceuticals R&D), Carolina Haefliger, Slavé Petrovski  
695  
696 <sup>1</sup>Bristol Myers Squibb, Route 206 and Province Line Road, Princeton, NJ 08543  
697 <sup>2</sup>Regeneron Pharmaceuticals Inc., 777 Old Saw Mill River Road, Tarrytown, New York 10591  
698 <sup>3</sup>Biogen Inc., 225 Binney Street, Cambridge, MA 02139  
699 <sup>4</sup>Alnylam Pharmaceuticals, 675 West Kendall St, Cambridge, MA 02142  
700 <sup>5</sup>AstraZeneca Centre for Genomics Research, Discovery Sciences, BioPharmaceuticals R&D,  
701 Cambridge, UK
